# Supplementary material for: Serum Proteomic Profiles of Patients with High and Low Risk of Endometrial Cancer Recurrence
Source: MDPI journal article supplement (doi:10.3390/ijms241914528), 2023-09-25
Supplement: s1 [file s1]

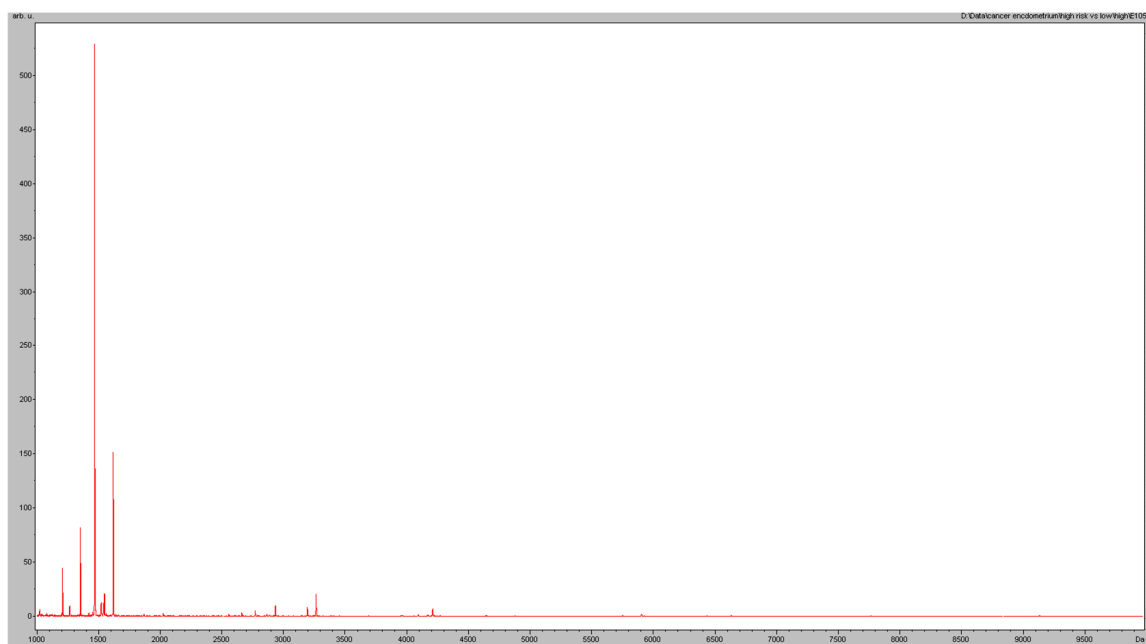

Figure S1. Averaged spectra for high-risk endometrial cancer recurrence group in the mass range 1000-10,000 Da.

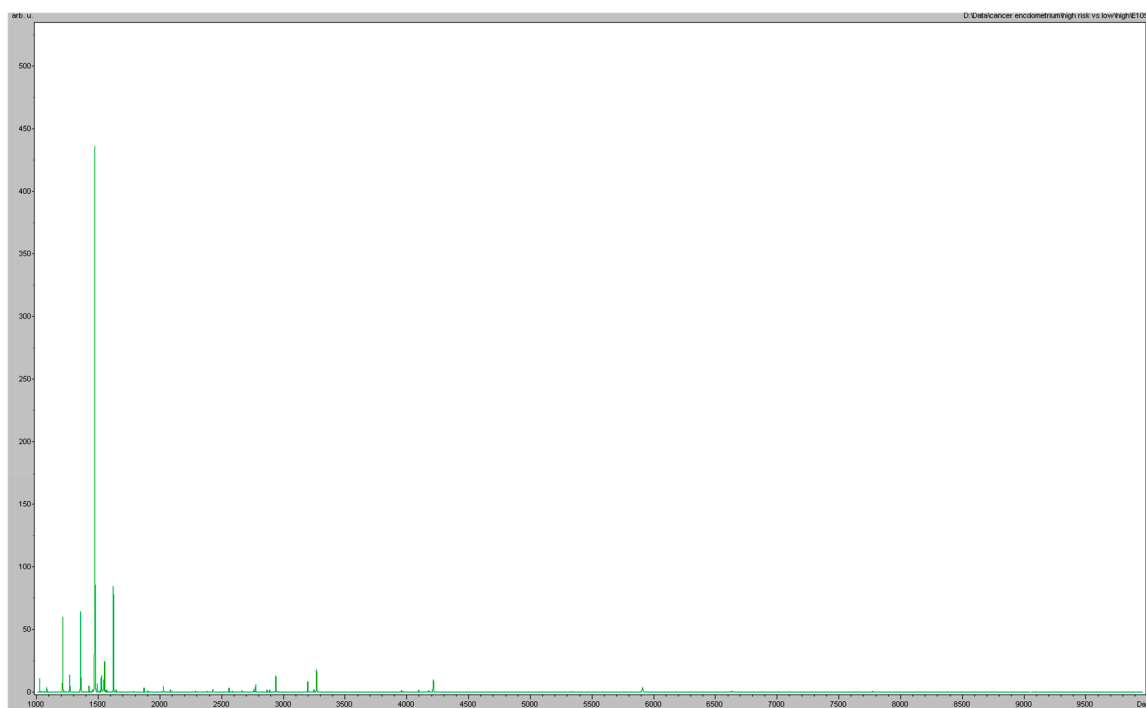

Figure S2. Averaged spectra for low-risk endometrial cancer recurrence group in the mass range 1000-10,000 Da.
